# Supplementary material for: Bioprospecting of Targeted Phenolic Compounds of Dictyota dichotoma, Gongolaria barbata, Ericaria amentacea, Sargassum hornschuchii and Ellisolandia elongata from the Adriatic Sea Extracted by Two Green Methods
Source: MDPI journal article supplement (doi:10.3390/md21020097), 2023-01-29
Supplement: s1 [file s1]

## Supplementary material

# Bioprospecting of targeted phenolic compounds of *Dictyota dichotoma*, *Cystoseira barbata*, *Ericaria amentacea*, *Sargassum hornschurchii* and *Ellisolandia elongata* from the Adriatic Sea extracted by two green methods

Aly Castillo <sup>1,2</sup>, Maria Celeiro <sup>1,2</sup>, Marta Lores <sup>2</sup>, Kristina Grgić <sup>3</sup>, Marija Banožić <sup>3,4</sup>, Igor Jerković <sup>5,\*</sup> and Stela Jokić <sup>3,\*</sup>

<sup>1</sup> CRETUS, Department of Analytical Chemistry, Nutrition and Food Science, Universidade de Santiago de Compostela, E-15782 Santiago de Compostela, Spain

<sup>2</sup> LIDSA, Department of Analytical Chemistry, Nutrition and Food Science, Faculty of Chemistry, Universidade de Santiago de Compostela, E-15782 Santiago de Compostela, Spain

<sup>3</sup> Department of Process Engineering, Faculty of Food Technology Osijek, University of Josip Juraj Strossmayer in Osijek, Franje Kuhača 18, 31000 Osijek, Croatia

<sup>4</sup> Faculty of Agriculture and Food Technology, University of Mostar, Biskupa Čule bb, 88000 Mostar, Bosnia and Herzegovina

<sup>5</sup> Department of Organic Chemistry, Faculty of Chemistry and Technology, University of Split, Ruđera Boškovića 35, 21000 Split, Croatia

\* Correspondence: igor@ktf-split.hr (I.J.); stela.jokic@ptfos.hr (S.J.)

**Table S1.** Target polyphenols. CAS number, molecular mass, retention time and MS/MS transitions.

| Polyphenols                  | CAS        | Molecular mass (g mol <sup>-1</sup> ) | Retention time (min) | MS/MS transitions* |                             |                      |
|------------------------------|------------|---------------------------------------|----------------------|--------------------|-----------------------------|----------------------|
|                              |            |                                       |                      | Precursor ion      | Product ions                | Collision energy, eV |
| Gallic acid                  | 149-91-7   | 170.1                                 | 2.35                 | <u>169.0</u>       | <u>125.0</u> , 153.1        | <u>17</u> , 15       |
| 2,4,6-trihydroxybenzoic acid | 71989-93-0 | 188.1                                 | 3.37                 | <u>168.9</u>       | <u>150.9</u> , 107.0        | <u>17</u> , 22       |
| Galocatechin                 | 970-73-0   | 306.3                                 | 3.80                 | <u>305.0</u>       | <u>175.1</u> , 158.4        | <u>19</u> , 12       |
| 3,4-dihydroxybenzoic acid    | 99-50-3    | 154.1                                 | 3.88                 | <u>152.9</u>       | <u>109.0</u> , 91.0, 108.0  | <u>17</u> , 19, 23   |
| 2,4-dihydroxybenzoic acid    | 89-86-1    | 154.1                                 | 4.41                 | <u>153.0</u>       | <u>109.0</u> , 65.0, 67.0   | <u>16</u> , 19, 23   |
| 2,5-dihydroxybenzoic acid    | 490-79-9   |                                       | 4.44                 | <u>153.0</u>       | <u>109.0</u> , 65.0, 67.0   | <u>16</u> , 19, 23   |
| Caftaric acid                | 67879-58-7 | 312.2                                 | 4.48                 | <u>310.9</u>       | <u>178.9</u> , 310.9, 148.9 | <u>17</u> , 14, 14   |
| 2,5-dihydroxybenzaldehyde    | 1194-98-5  | 138.1                                 | 4.63                 | <u>136.9</u>       | <u>81.0</u> , 109.0         | <u>21</u> , 18, 14   |
| 3,4-dihydroxybenzaldehyde    | 139-85-5   | 138.1                                 | 4.64                 | <u>136.9</u>       | <u>81.0</u> , 109.04        | <u>21</u> , 24, 25   |
| 3-hydroxybenzoic acid        | 99-06-9    | 138.1                                 | 5.15                 | <u>137.0</u>       | <u>93.0</u> , 65.0          | <u>17</u> , 27       |
| 4-hydroxybenzoic acid        | 99-96-7    | 138.1                                 | 5.18                 | <u>137.0</u>       | <u>93.0</u> , 65.0          | <u>17</u> , 27       |
| Procyanidin B1               | 20315-25-7 | 578.5                                 | 5.30                 | <u>577.0</u>       | <u>407.0</u> , 288.9, 424.9 | <u>26</u> , 25, 26   |
| Catechin                     | 18829-70-4 | 290.3                                 | 5.34                 | <u>289.0</u>       | <u>245.0</u> , 203.1        | <u>17</u> , 22       |
| 2,6-dihydroxybenzoic acid    | 303-07-1   | 154.1                                 | 5.54                 | <u>153.0</u>       | <u>109.0</u> , 135.0        | <u>17</u> , 16       |
| 3,5-dihydroxybenzoic acid    | 99-10-5    | 154.1                                 | 5.54                 | <u>153.0</u>       | <u>109.0</u> , 135.0        | <u>17</u> , 16       |
| 3-hydroxybenzaldehyde        | 100-83-4   | 122.1                                 | 5.67                 | <u>121.0</u>       | <u>93.0</u> , 92.0, 120.0   | <u>20</u> , 23, 19   |
| 4-hydroxybenzaldehyde        | 123-08-0   | 122.1                                 | 5.67                 | <u>121.0</u>       | <u>93.0</u> , 92.0, 120.0   | <u>20</u> , 23, 19   |

|                               |             |        |       |              |                             |                    |
|-------------------------------|-------------|--------|-------|--------------|-----------------------------|--------------------|
|                               |             |        |       |              |                             |                    |
| 3,4-dimethoxybenzoic acid     | 93-07-2     | 182.0  | 6.03  | <u>182.9</u> | <u>137.0</u> , 106.9        | <u>6</u> , 22      |
| Procyanidin B2                | 29106-49-8  | 578.5  | 6.10  | <u>577.0</u> | <u>407.0</u> , 288.9, 424.9 | <u>26</u> , 25, 26 |
| Chlorogenic acid              | 327-97-9    | 354.3  | 6.12  | <u>353.0</u> | <u>191.0</u> , 85.0, 93.0   | <u>22</u> , 43, 45 |
| Ampelopsin                    | 27200-12-0  | 320.25 | 6.20  | <u>319.0</u> | <u>193.1</u> , 301.1, 125.1 | <u>15</u> , 13, 27 |
| Caffeic acid                  | 331-39-5    | 180.2  | 6.50  | <u>178.8</u> | <u>135.0</u> , 134.0        | <u>19</u> , 28     |
| Procyanidin C1                | 37064-30-5  | 866.8  | 6.52  | <u>577.0</u> | <u>288.3</u> , 407.0, 424.9 | <u>26</u> , 25, 26 |
| Epicatechin                   | 35323-91-2  | 290.3  | 6.56  | <u>289.0</u> | <u>245.0</u> , 203.1        | <u>17</u> , 22     |
| Epigallocatechingallate       | 989-51-5    | 458.4  | 6.79  | <u>457.1</u> | <u>169.0</u> , 125.0, 305.0 | <u>21</u> , 42, 21 |
| Procyanidin A1                | 12798-56-0  | 576.5  | 6.80  | <u>577.0</u> | <u>407.0</u> , 288.9, 424.9 | <u>26</u> , 25, 26 |
| Gallocatechingallate          | 84650-60-2  | 458.4  | 7.29  | <u>457.1</u> | <u>169.0</u> , 125.0, 305.0 | <u>21</u> , 42, 21 |
| Procyanidin A2                | 41743-41-3  | 576.5  | 7.32  | <u>577.0</u> | <u>287.0</u> , 136.9, 425.0 | <u>32</u> , 62, 13 |
| Orientine                     | 28608-75-5  | 448.4  | 7.38  | <u>477.1</u> | <u>327.1</u> , 357.1        | <u>23</u> , 22     |
| 7-hydroxycoumarin             | 93-35-6     | 162.1  | 7.80  | <u>162.9</u> | <u>107.0</u> , 77.0, 91.0   | <u>22</u> , 34, 20 |
| 4-hydroxycinnamic acid        | 501-98-4    | 164.2  | 7.89  | <u>163.0</u> | <u>119.0</u> , 93.0, 117.0  | <u>17</u> , 37, 38 |
| Epicatechingallate            | 1257-08-5   | 442.4  | 7.92  | <u>441.1</u> | <u>289.1</u> , 125.0, 169.0 | <u>20</u> , 42, 24 |
| Polidatin                     | 27208-80-6  | 390.4  | 7.98  | <u>389.1</u> | <u>227.1</u> , 185.1, 143.1 | <u>22</u> , 38, 48 |
| Taxifolin                     | 480-18-2    | 304.25 | 8.06  | <u>303.0</u> | <u>285.1</u> , 125.1, 175.1 | <u>14</u> , 23, 22 |
| Catechingallate               | 130405-40-2 | 442.3  | 8.12  | <u>441.1</u> | <u>289.1</u> , 125.0, 169.0 | <u>20</u> , 42, 24 |
| 3,4-dimethoxybenzaldehyde     | 120-14-9    | 166.2  | 8.33  | <u>167.0</u> | <u>139.0</u> , 108.0, 124.0 | <u>13</u> , 21, 18 |
| Trans-ferulic acid            | 537-98-4    | 194.2  | 8.92  | <u>192.8</u> | <u>177.9</u> , 133.9        | <u>12</u> , 16     |
| 4-methoxybenzaldehyde         | 123-11-5    | 136.1  | 9.11  | <u>136.9</u> | <u>109.0</u> , 77.0, 94.0   | <u>12</u> , 23, 18 |
| Resveratrol                   | 501-36-0    | 228.07 | 9.31  | <u>227.1</u> | <u>185.1</u> , 115.1, 117.1 | <u>21</u> , 47, 20 |
| Robinetin                     | 490-31-3    | 302.23 | 9.50  | <u>301.2</u> | <u>162.6</u> , 273.0        | <u>20</u> , 20     |
| Quercetin-3-glucuronide       | 22688-79-5  | 478.4  | 9.54  | <u>479.0</u> | <u>461.5</u> , 302.9        | <u>14</u> , 18     |
| Quercetin-3-rutinoside        | 153-18-4    | 610.5  | 9.72  | <u>609.1</u> | <u>270.9</u> , 178.8, 300.0 | <u>96</u> , 44, 37 |
| Quercetin-3-glucoside         | 482-35-9    | 463.4  | 9.75  | <u>465.0</u> | <u>256.9</u> , 302.9        | <u>41</u> , 14     |
| Myricetin                     | 529-44-2    | 318.2  | 10.09 | <u>319.0</u> | <u>153.0</u> , 217.0, 245.0 | <u>31</u> , 31, 27 |
| Ellagic acid                  | 476-66-4    | 302.19 | 10.21 | <u>301.0</u> | <u>145.1</u> , 185.1, 173.1 | <u>39</u> , 29, 36 |
| Rosmarinic acid               | 20283-92-5  | 360.3  | 10.37 | <u>359.0</u> | <u>161.1</u> , 133.1, 135.1 | <u>23</u> , 42, 38 |
| 3,4,5-trimethoxycinnamic acid | 90-50-6     | 238.2  | 11.13 | <u>239.0</u> | <u>221.0</u> , 162.9, 190.0 | <u>11</u> , 27, 19 |
| Astragalin                    | 480-10-4    | 448.4  | 11.16 | <u>447.0</u> | <u>255.1</u> , 284.1, 227.1 | <u>40</u> , 28, 49 |
| 3,5-dimethoxybenzaldehyde     | 7311-34-4   | 166.2  | 11.26 | <u>167.1</u> | <u>124.0</u> , 77.0         | <u>17</u> , 26     |
| Fisetin                       | 528-48-3    | 286.2  | 11.50 | <u>285.0</u> | <u>135.0</u> , 163.0        | <u>15</u> , 15     |
| Daidzein                      | 486-66-8    | 254.2  | 11.53 | <u>253.0</u> | <u>133.1</u> , 91.1, 135.1  | <u>34</u> , 40, 30 |
| Epsilon-viniferin             | 62218-08-0  | 454.5  | 11.82 | <u>455.1</u> | <u>361.1</u> , 349.1, 350.1 | <u>20</u> , 20, 20 |
| Quercetine                    | 117-39-5    | 302.2  | 11.83 | <u>303.0</u> | <u>229.1</u> , 153.0        | <u>28</u> , 33     |
| Naringenin                    | 67604-48-2  | 272.2  | 11.89 | <u>272.0</u> | <u>119.0</u> , 147.0        | <u>20</u> , 22     |
| Luteolin                      | 491-70-3    | 286.2  | 12.17 | <u>285.0</u> | <u>199.0</u> , 175.0, 241.0 | <u>20</u> , 22, 20 |
| Kaempferol                    | 520-18-3    | 286.2  | 12.35 | <u>285.0</u> | <u>184.9</u> , 239.1        | <u>30</u> , 35     |
| Isorhamnetin                  | 480-19-3    | 316.3  | 12.52 | <u>317.0</u> | <u>302.0</u> , 165.0, 257.0 | <u>20</u> , 24, 35 |
| Diosmetin                     | 520-34-3    | 300.26 | 12.64 | <u>299.0</u> | <u>133.1</u> , 63.1, 65.1   | <u>46</u> , 48, 54 |
| Apigenin                      | 520-36-5    | 270.2  | 12.63 | <u>269.0</u> | <u>117.1</u> , 149.1, 151.0 | <u>37</u> , 26, 26 |
| Chrysin                       | 480-40-0    | 254.2  | 13.24 | <u>253.1</u> | <u>143.1</u> , 63.2, 145.1  | <u>30</u> , 34, 31 |

\* Underlined MS transition is used for quantification purpose
